# Supplementary material for: A chest physician's guide to mechanisms of sinonasal disease
Source: HighWire-hosted journal article supplement (doi:10.1136/thoraxjnl-2014-205520), 2015-01-06
Supplement: thoraxjnl-2014-205520supp.pdf [file thoraxjnl-2014-205520supp.pdf]

# ONLINE SUPPLEMENT

## INTRODUCTION

The most common presentation form of upper airway disease is rhinitis, which is defined as a symptomatic inflammation of the nasal mucosa with at least two symptoms, among which are nasal obstruction, rhinorrhea, itchy nose and/or sneezing.[1] When this inflammation extends to the mucosa of the paranasal sinuses, the consensus term of rhinosinusitis is used.[2] Rhinosinusitis is defined as inflammation of the sinonasal mucosa characterized by at least two of the following symptoms: nasal obstruction, facial pain or headache, smell dysfunction, and/or anterior or posterior secretions. Based upon duration of symptoms we distinguish acute rhinosinusitis (ARS; <12 weeks) and chronic rhinosinusitis (CRS; >12 weeks) which again has two major clinical phenotypes based on the findings of nasal polyposis (NP): CRS with NP (CRSwNP) and CRS without NP.[2]

The close link between upper and lower airway inflammation is well known in the context of “global airway disease.[3] The majority of asthmatic individuals suffer from rhinitis and, conversely, patients with rhinitis or CRS have an increased risk of developing asthma.[4-8] However, the nose is not involved only in asthma, 75-88% COPD patients also have sinonasal symptoms [9-11] and 45-84% of bronchiectasis patients suffer from CRS.[12, 13] Additionally, treating nasal pathology has beneficial effects on the lower airway symptoms in chronic airway disease.[14-16]

## **ENDOGENOUS FACTORS ASSOCIATED WITH UPPER AIRWAY DISEASE**

### **Immune deficiencies**

More subtle abnormalities of the innate immune system are linked to the occurrence of CRS. Thus, associations have been described between CRS and defects in epithelial barrier function,[17] reduced expression of antimicrobial proteins, such as S100 proteins [18] and lactoferrins,[19], and abnormalities in the novel Palate, Lung, and Nasal Epithelial Clones (PLUNC) protein family.[20]

## **EXOGENOUS FACTORS ASSOCIATED WITH UPPER AIRWAY DISEASE**

### **Viruses**

Nasal epithelial cells of allergic rhinitis patients showed an upregulation of TLR 3, the key receptor for the recognition of viral RNA, as well as the downstream signaling adaptor NF $\kappa$ B.[21, 22] Additionally, nasal allergen provocations induced an upregulation of the adhesion molecule ICAM-1, the principal receptor for HRV, in both nasal and bronchial epithelium of allergic rhinitis patients without asthma.[23] However, the functional relevance still remains unclear, since allergy does not necessarily alter symptomatology nor inflammation during a common cold.[24, 25]

### **Bacteria**

Within the concept of global airway disease, chronically inflamed sinuses might in some cases serve as a reservoir for pathogens that can descend into the lower airway tract, as it has been shown that identical genotypes of *S. aureus* and *P. aeruginosa* were present in the upper and lower airways of CF patients.[26]

### **Allergens**

When genetically predisposed or so-called atopic individuals who are exposed to respiratory allergens, inhaled allergens are taken up and processed by antigen presenting cells (dendritic cells) present in the respiratory mucosa. These antigenpresenting cells drain to the local lymph nodes where they present the processed allergen to naïve CD4<sup>+</sup> cells. The local cytokine environment causes the CD4<sup>+</sup> cells to shift towards the Th2-subtype with production of Th2 cytokines such as IL-4, IL-5 and IL-13. These cytokines activate B-cells to secrete antigen-specific IgE, which binds to mast cells residing in the airway mucosa. Renewed contact with the allergen results in cross-linking of its mast cell-

bound IgE leading to mast cell degranulation with release of preformed mediators such as histamine, tryptase and leukotrienes that act on the surrounding tissues causing the acute allergic symptoms of sneezing, rhinorrhea and itch. Th2-cytokines are responsible for the late allergic response by inducing growth and attraction of eosinophils and lymphocytes that leads to a persistent inflammation causing swelling of the nasal mucosa with symptoms of nasal blockage, and finally tissue remodeling.[27]

Allergic rhinitis is relatively easy to diagnose based on the combination of typical symptoms and positive skin prick tests (SPT) or antigen-specific IgEs in the serum.[28]

Several studies from Rondon suggest that some patients with negative SPT or serum IgEs against the clinically suspected allergens, may be wrongly considered as having non-allergic rhinitis. They describe the existence of a “locally mediated allergic rhinitis”, showing a local production of specific IgE antibodies and a Th2-type inflammation in the nasal mucosa in combination with a positive nasal allergen provocation test.[29] Although further studies are needed to establish this new entity, the concept of local allergic rhinitis emphasizes the need for proper diagnostics and provocation testing in patients, initially diagnosed with non-allergic rhinitis.

### **Occupational agents**

LMW agents with a sensitizing capacity or ‘LMW sensitizers’ are mostly synthetic chemicals (di-isocyanates, persulphate salts, aldehydes, and several drugs), but various metallic agents (platinum salts, chromium, nickel) and wood-derived chemicals (red cedar, mansonina) also exhibit sensitizing potential. A second group of LMW agents consists of irritants with the best-known examples being chlorination products, ozone, acids and ammonia, but the list is extensive.

The production of (detectable) antigen-specific IgE against these LMW sensitizers is variable and, hence, SPT or serum IgE testing cannot be used to diagnose

sensitization and a positive nasal provocation test with the the suspected agent is required for the diagnosis of occupational rhinitis or asthma.[30]

*De novo* asthma caused by an acute inhalation accident is known as “acute-onset irritant-induced asthma” [31] (previously Reactive Airways Dysfunction Syndrome (RADS)). Persistent nasal blockage, runny nose or sneezing may also follow inhalation accidents and this phenomenon has been referred to as Reactive Upper Airway Dysfunction Syndrome (RUADS).[32]

Additionally, several studies suggest that patients suffering from pre-existing rhinitis show exaggerated nasal responses to inhalation of irritants. For example, allergic rhinitis patients showed an immediate nasal congestion in response to nasal provocations with chlorine gas in contrast to healthy subjects.[33]

[34] [35] [36] [37]

## SUPPLEMENTAL REFERENCES

- E1. Bousquet J, Khaltaev N, Cruz AA, Denburg J, Fokkens WJ, Togias A, et al. Allergic Rhinitis and its Impact on Asthma (ARIA) 2008 update (in collaboration with the World Health Organization, GA(2)LEN and AllerGen). *Allergy*. 2008;63 Suppl 86:8-160.
- E2. Fokkens WJ, Lund VJ, Mullol J, Bachert C, Alobid I, Baroody F, et al. EPOS 2012: European position paper on rhinosinusitis and nasal polyps 2012. A summary for otorhinolaryngologists. *Rhinology*. 2012;50(1):1-12.
- E3. Grossman J. One airway, one disease. *Chest*. 1997;111(2 Suppl):11S-6S.
- E4. Jarvis D, Newson R, Lotvall J, Hastan D, Tomassen P, Keil T, et al. Asthma in adults and its association with chronic rhinosinusitis: the GA2LEN survey in Europe. *Allergy*. 2012;67(1):91-8.
- E5. Leynaert B, Bousquet J, Neukirch C, Liard R, Neukirch F. Perennial rhinitis: An independent risk factor for asthma in nonatopic subjects: results from the European Community Respiratory Health Survey. *J Allergy Clin Immunol*. 1999;104(2 Pt 1):301-4.
- E6. Leynaert B, Neukirch C, Kony S, Guenegou A, Bousquet J, Aubier M, et al. Association between asthma and rhinitis according to atopic sensitization in a population-based study. *J Allergy Clin Immunol*. 2004;113(1):86-93.
- E7. Settignano GA, Chafee FH. Nasal polyps in asthma and rhinitis. A review of 6,037 patients. *J Allergy Clin Immunol*. 1977;59(1):17-21.
- E8. Shaaban R, Zureik M, Soussan D, Neukirch C, Heinrich J, Sunyer J, et al. Rhinitis and onset of asthma: a longitudinal population-based study. *Lancet*. 2008;372(9643):1049-57.
- E9. Hens G, Vanaudenaerde BM, Bullens DM, Piessens M, Decramer M, Dupont LJ, et al. Sinonasal pathology in nonallergic asthma and COPD: 'united airway disease' beyond the scope of allergy. *Allergy*. 2008;63(3):261-7.
- E10. Hurst JR, Wilkinson TM, Donaldson GC, Wedzicha JA. Upper airway symptoms and quality of life in chronic obstructive pulmonary disease (COPD). *Respiratory medicine*. 2004;98(8):767-70.
- E11. Roberts NJ, Lloyd-Owen SJ, Rapado F, Patel IS, Wilkinson TM, Donaldson GC, et al. Relationship between chronic nasal and respiratory symptoms in patients with COPD. *Respiratory medicine*. 2003;97(8):909-14.
- E12. Shirahata Y. [Correlation between upper airway tract and lower airway tract in the break down of sinobronchiectasis]. *Nihon Jibiinkoka Gakkai kaiho*. 1990;93(12):1991-8.
- E13. Shoemark A, Ozerovitch L, Wilson R. Aetiology in adult patients with bronchiectasis. *Respiratory medicine*. 2007;101(6):1163-70.
- E14. Corren J, Manning BE, Thompson SF, Hennessy S, Strom BL. Rhinitis therapy and the prevention of hospital care for asthma: a case-control study. *J Allergy Clin Immunol*. 2004;113(3):415-9.
- E15. Ehnhage A, Olsson P, Kolbeck KG, Skedinger M, Dahlen B, Alenius M, et al. Functional endoscopic sinus surgery improved asthma symptoms as well as PEFr and olfaction in patients with nasal polyposis. *Allergy*. 2009;64(5):762-9.
- E16. Ragab S, Scadding GK, Lund VJ, Saleh H. Treatment of chronic rhinosinusitis and its effects on asthma. *The European respiratory journal*. 2006;28(1):68-74.

- E17. Soyka MB, Wawrzyniak P, Eiwegger T, Holzmann D, Treis A, Wanke K, et al. Defective epithelial barrier in chronic rhinosinusitis: The regulation of tight junctions by IFN-gamma and IL-4. *J Allergy Clin Immunol*. 2012.
- E18. Richer SL, Truong-Tran AQ, Conley DB, Carter R, Vermeylen D, Grammer LC, et al. Epithelial genes in chronic rhinosinusitis with and without nasal polyps. *AmJ Rhinol*. 2008;22(3):228-34.
- E19. Psaltis AJ, Bruhn MA, Ooi EH, Tan LW, Wormald PJ. Nasal mucosa expression of lactoferrin in patients with chronic rhinosinusitis. *Laryngoscope*. 2007;117(11):2030-5.
- E20. Seshadri S, Lin DC, Rosati M, Carter RG, Norton JE, Suh L, et al. Reduced expression of antimicrobial PLUNC proteins in nasal polyp tissues of patients with chronic rhinosinusitis. *Allergy*. 2012;67(7):920-8.
- E21. Vroiling AB, Duinsbergen D, Fokkens WJ, van Drunen CM. Allergen induced gene expression of airway epithelial cells shows a possible role for TNF-alpha. *Allergy*. 2007;62(11):1310-9.
- E22. Vroiling AB, Jonker MJ, Luiten S, Breit TM, Fokkens WJ, van Drunen CM. Primary nasal epithelium exposed to house dust mite extract shows activated expression in allergic individuals. *AmJ RespirCell MolBiol*. 2008;38(3):293-9.
- E23. Braunstahl GJ, Overbeek SE, Kleinjan A, Prins JB, Hoogsteden HC, Fokkens WJ. Nasal allergen provocation induces adhesion molecule expression and tissue eosinophilia in upper and lower airways. *J Allergy Clin Immunol*. 2001;107(3):469-76.
- E24. Fraenkel DJ, Bardin PG, Sanderson G, Lampe F, Johnston SL, Holgate ST. Immunohistochemical analysis of nasal biopsies during rhinovirus experimental colds. *American journal of respiratory and critical care medicine*. 1994;150(4):1130-6.
- E25. Skoner DP, Doyle WJ, Seroky J, Van Deusen MA, Fireman P. Lower airway responses to rhinovirus 39 in healthy allergic and nonallergic subjects. *The European respiratory journal*. 1996;9(7):1402-6.
- E26. Mainz JG, Naehrlich L, Schien M, Kading M, Schiller I, Mayr S, et al. Concordant genotype of upper and lower airways *P aeruginosa* and *S aureus* isolates in cystic fibrosis. *Thorax*. 2009;64(6):535-40.
- E27. Greiner AN, Hellings PW, Rotiroti G, Scadding GK. Allergic rhinitis. *Lancet*. 2011;378(9809):2112-22.
- E28. Hellings PW, Scadding G, Alobid I, Bachert C, Fokkens WJ, Gerth van Wijk R, et al. Executive summary of European Task Force document on diagnostic tools in rhinology. *Rhinology*. 2012;50(4):339-52.
- E29. Rondon C, Campo P, Togias A, Fokkens WJ, Durham SR, Powe DG, et al. Local allergic rhinitis: concept, pathophysiology, and management. *J Allergy Clin Immunol*. 2012;129(6):1460-7.
- E30. Hox V, Steelant B, Fokkens W, Nemery B, Hellings PW. Occupational upper airway disease: how work affects the nose. *Allergy*. 2014.
- E31. Vandenplas O, Wiszniewska M, Raulf M, de Blay F, Gerth van Wijk R, Moscato G, et al. EAACI position paper: irritant-induced asthma. *Allergy*. 2014;69(9):1141-53.
- E32. Meggs WJ. RADS and RUDS--the toxic induction of asthma and rhinitis. *JToxicolClinToxicol*. 1994;32(5):487-501.

- E33. Shusterman D, Balmes J, Avila PC, Murphy MA, Matovinovic E. Chlorine inhalation produces nasal congestion in allergic rhinitis without mast cell degranulation. *EurRespirJ*. 2003;21(4):652-7.
- E34. Jensen F, Woudwyk M, Teles A, Woidacki K, Taran F, Costa S, et al. Estradiol and progesterone regulate the migration of mast cells from the periphery to the uterus and induce their maturation and degranulation. *PLoSOne*. 2010;5(12):e14409.
- E35. Hamano N, Terada N, Maesako K, Ikeda T, Fukuda S, Wakita J, et al. Expression of histamine receptors in nasal epithelial cells and endothelial cells--the effects of sex hormones. *International archives of allergy and immunology*. 1998;115(3):220-7.
- E36. Haczku A, Panettieri RA, Jr. Social stress and asthma: the role of corticosteroid insensitivity. *J Allergy Clin Immunol*. 2010;125(3):550-8.
- E37. Theoharides TC, Enakuaa S, Sismanopoulos N, Asadi S, Papadimas EC, Angelidou A, et al. Contribution of stress to asthma worsening through mast cell activation. *AnnAllergy Asthma Immunol*. 2012;109(1):14-9.
